# Supplementary material
Source: publisher figshare collection journal article supplement (https://gsapubs.figshare.com/ndownloader/files/25657034)
Supplement: Supplementary file 1 [file 25657034]

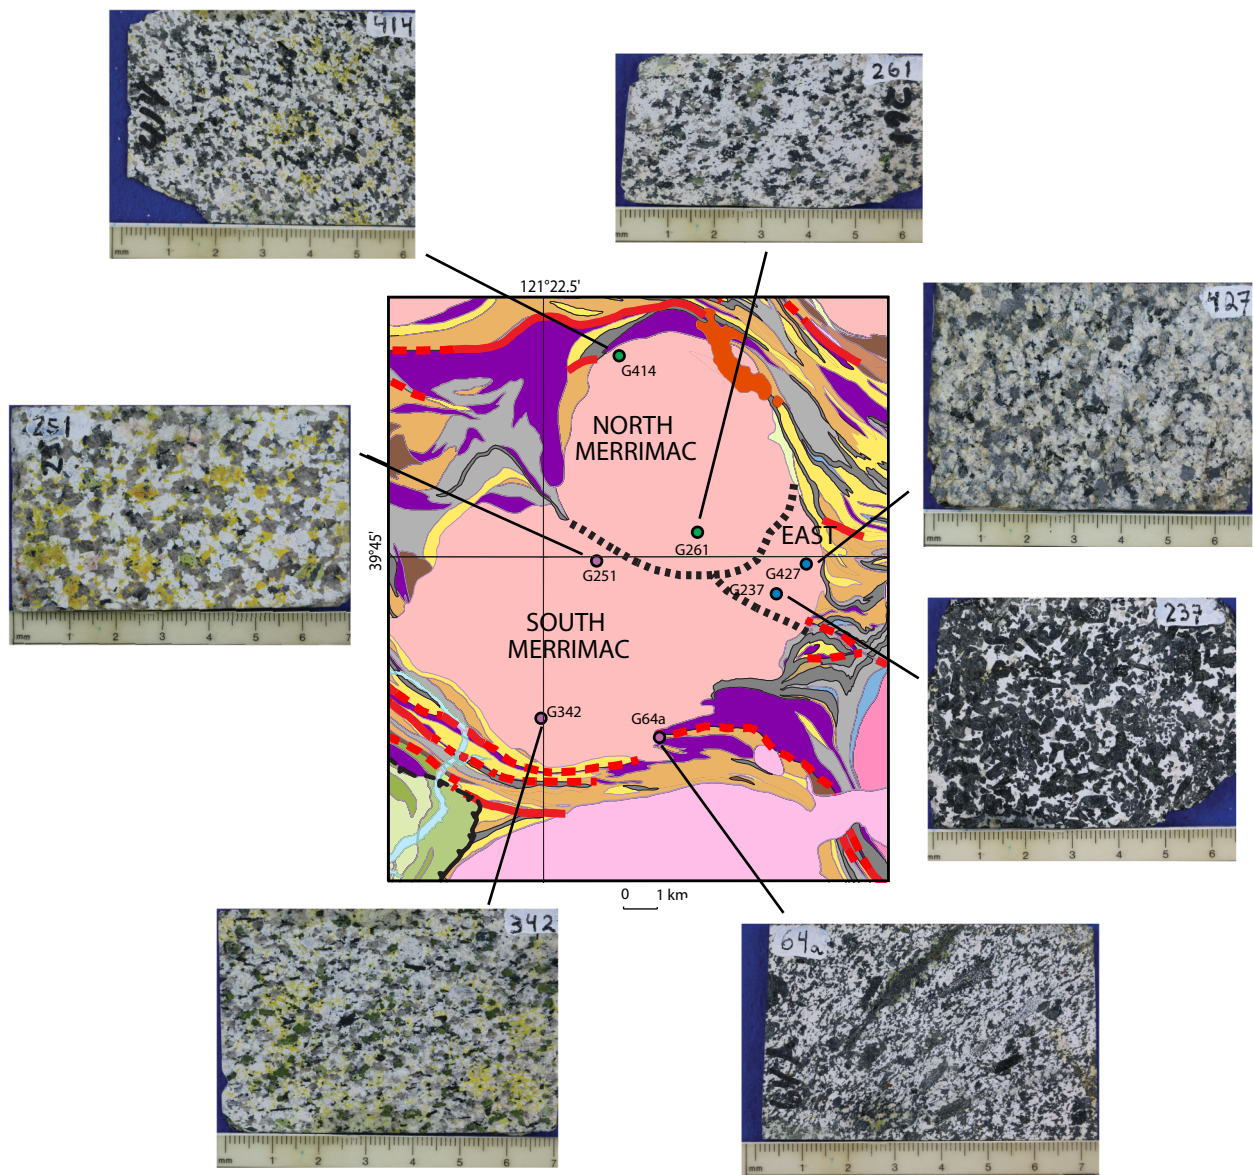

Figure S2. Examples of textures from the Merrimac plutons; locations plotted on index map, simplified from Figure 3. Sample 237 is an example of cumulate texture in East Merrimac pluton. Sample 064a shows well-developed fabric near pluton contact with wall rock. Other samples show alignment of hornblende and biotite that is interpreted as magmatic foliation (e.g. Guglielmo, 1993a).
